# Supplementary material
Source: Elsevier journal article supplement (https://www.sciencedirect.com/science/article/pii/S2531043721001586)
Supplement: mmc1 [file S2531043721001586:mmc1.docx]

**Supplemental material**

Table S1. Total number of notifications and notification rate of tuberculosis in Portugal by population group and region, 2010-17.

|  | **2010** | | **2011** | | **2012** | | **2013** | | **2014** | | **2015** | | **2016** | | **2017** | |
| --- | --- | --- | --- | --- | --- | --- | --- | --- | --- | --- | --- | --- | --- | --- | --- | --- |
| **Region** | N | Rate | N | Rate | N | Rate | N | Rate | N | Rate | N | Rate | N | Rate | N | Rate |
| All regions | 2,715 | 25.68 | 2,609 | 24.75 | 2,606 | 24.85 | 2,410 | 23.11 | 2,278 | 21.96 | 2,196 | 21.23 | 1,936 | 18.78 | 1,800 | 17.49 |
| Azores | 18 | 7.29 | 28 | 11.33 | 23 | 9.29 | 20 | 8.08 | 24 | 9.74 | 42 | 17.09 | 22 | 8.97 | 13 | 5.33 |
| Alentejo | 68 | 15.49 | 69 | 15.86 | 60 | 13.95 | 49 | 11.51 | 55 | 13.12 | 60 | 14.52 | 47 | 11.50 | 44 | 10.89 |
| Algarve | 126 | 27.92 | 104 | 23.31 | 102 | 22.95 | 79 | 17.86 | 100 | 22.65 | 95 | 21.50 | 81 | 18.35 | 76 | 17.29 |
| Centre | 358 | 15.21 | 364 | 15.56 | 347 | 14.95 | 337 | 14.64 | 325 | 14.23 | 298 | 13.10 | 261 | 11.50 | 235 | 10.45 |
| LTV* | 1,150 | 32.33 | 1,064 | 29.89 | 1,083 | 30.52 | 993 | 28.10 | 934 | 26.46 | 886 | 25.10 | 817 | 23.11 | 789 | 22.26 |
| Madeira | 25 | 9.33 | 26 | 9.84 | 26 | 9.88 | 20 | 7.65 | 20 | 7.73 | 17 | 6.63 | 14 | 5.49 | 11 | 4.32 |
| North | 970 | 29.79 | 954 | 29.34 | 965 | 29.85 | 912 | 28.37 | 820 | 25.66 | 798 | 25.10 | 694 | 21.94 | 632 | 20.02 |
| **Sex** |  |  |  |  |  |  |  |  |  |  |  |  |  |  |  |  |
| Female | 897 | 16.25 | 847 | 15.37 | 911 | 16.59 | 862 | 15.76 | 829 | 15.21 | 725 | 13.33 | 669 | 12.33 | 640 | 11.80 |
| Male | 1,818 | 35.97 | 1,762 | 35.03 | 1,695 | 33.93 | 1,548 | 31.22 | 1,449 | 29.43 | 1,471 | 30.01 | 1,267 | 25.95 | 1,160 | 23.83 |
| **Age** |  |  |  |  |  |  |  |  |  |  |  |  |  |  |  |  |
| Under 5 | 18 | 3.60 | 23 | 4.69 | 32 | 6.65 | 22 | 4.75 | 17 | 3.78 | 16 | 3.67 | 21 | 4.90 | 25 | 5.87 |
| >5 years | 2,692 | 26.72 | 2,579 | 25.66 | 2,571 | 25.69 | 2,385 | 23.94 | 2,260 | 22.77 | 2,178 | 21.99 | 1,910 | 19.33 | 1,775 | 17.99 |
| **Nationality** |  |  |  |  |  |  |  |  |  |  |  |  |  |  |  |  |
| Portuguese | 2346 | 23.16 | 2289 | 22.65 | 2228 | 22.12 | 2060 | 20.54 | 1980 | 19.83 | 1902 | 19.10 | 1617 | 16.31 | 1487 | 15.06 |
| Non-nationals | 362 | 81.71 | 317 | 72.92 | 354 | 85.38 | 290 | 72.82 | 221 | 56.65 | 257 | 66.97 | 310 | 78.89 | 310 | 74.40 |
| **HIV status** |  |  |  |  |  |  |  |  |  |  |  |  |  |  |  |  |
| Positive | 335 | 1229.72 | 316 | 1121.76 | 301 | 1033.30 | 252 | 838.60 | 226 | 732.98 | 232 | 732.18 | 183 | 563.48 | 135 | 407.24 |
| Negative | 2019 | 19.15 | 1919 | 18.25 | 1976 | 18.89 | 1839 | 17.69 | 1733 | 16.75 | 1753 | 17.00 | 1514 | 14.73 | 1048 | 10.22 |
| **Site of infection** |  |  |  |  |  |  |  |  |  |  |  |  |  |  |  |  |
| Extrapulmonary | 751 | 7.10 | 702 | 6.82 | 723 | 7.06 | 696 | 6.67 | 627 | 6.04 | 628 | 6.07 | 552 | 5.35 | 507 | 4.92 |
| Pulmonar | 1,946 | 18.41 | 1,897 | 17.99 | 1,874 | 17.87 | 1,700 | 16.30 | 1,627 | 15.68 | 1,558 | 15.07 | 1,369 | 13.28 | 1290 | 12.54 |

*Lisbon and Tagus Valley
