# Supplementary material
Source: Elsevier journal article supplement (https://www.sciencedirect.com/science/article/pii/S2531043721001586)
Supplement: mmc2 [file S2531043721001586:mmc2.xlsx]

## Sheet: Folha3
				Region	2010	2011	2012	2013	2014	2015	2016	2017
				Azores	7.29463	11.3271	9.29109	8.08277	9.74212	17.0894	8.96923	5.33088
				Alentejo	15.4919	15.8646	13.948	11.5088	13.1191	14.5193	11.4989	10.8856
				Algarve	27.9191	23.3111	22.9528	17.8588	22.6517	21.4967	18.3478	17.2878
				Centre	15.2094	15.5636	14.9525	14.6382	14.2265	13.0988	11.5001	10.4552
				LTV	32.3261	29.8892	30.5229	28.0987	26.4617	25.1036	23.1117	22.259
				Madeira	9.32958	9.83969	9.88251	7.65366	7.73138	6.62964	5.49287	4.32444
				North	29.787	29.3422	29.8461	28.3736	25.6654	25.0977	21.9387	20.0212
				Portugal	25.68	24.75	24.85	23.11	21.96	21.23	18.78	17.49
